# Supplementary material
Source: publisher site journal article supplement (https://www.spandidos-publications.com/2758/downloadSupplementary)

Figure S1. Different  $\alpha$ -diversity indexes of healthy individuals and HIV-infected individuals. Values are expressed as the median  $\pm$  IQR. (A) Chao 1; (B) observed\_species; (C) PD\_whole\_tree. \*P<0.05. Groups: Mp, HIV patients; Mh, healthy controls. HIV, human immunodeficiency virus.

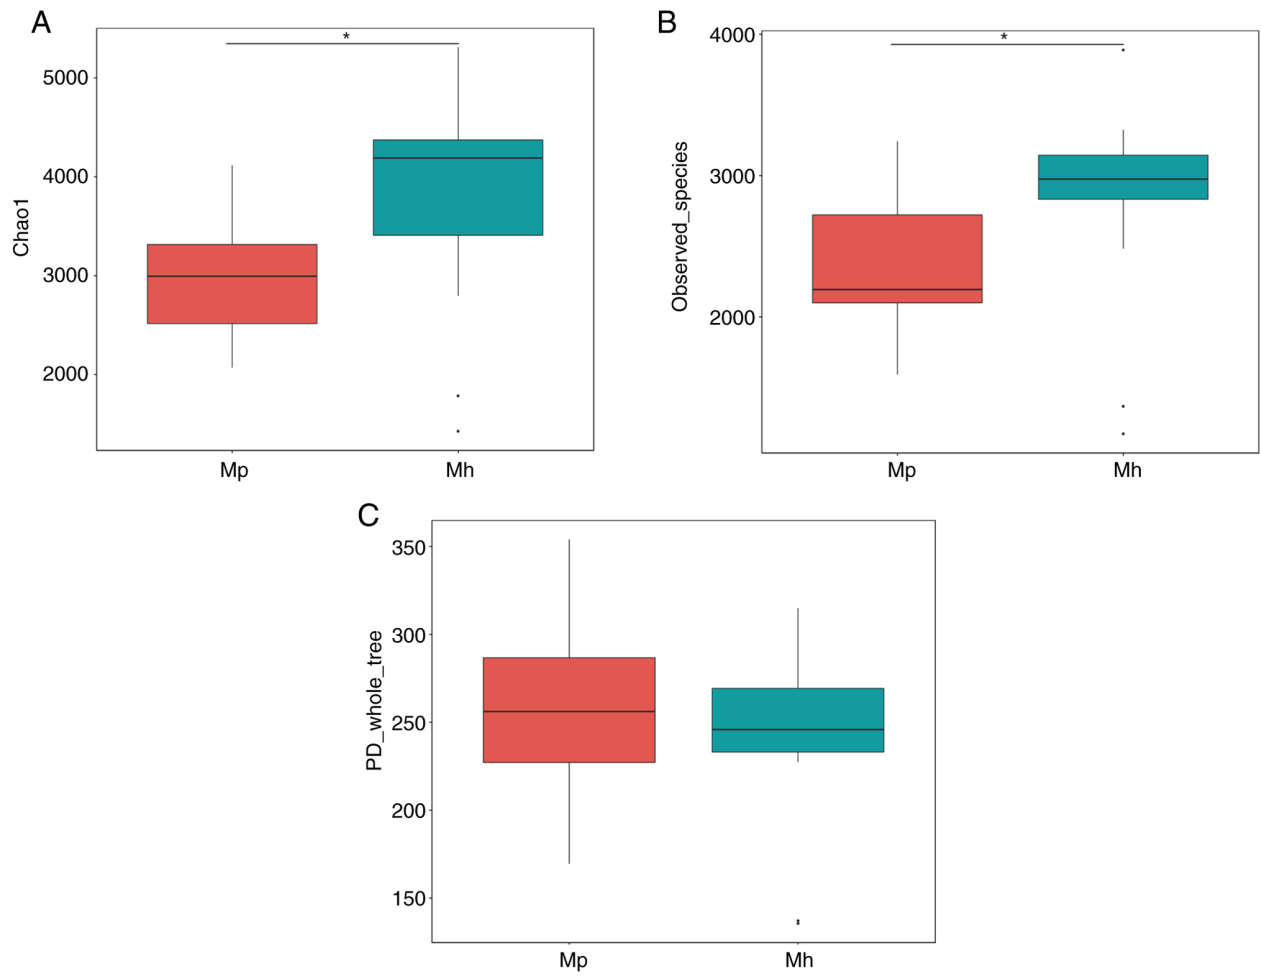

Supplement: Supplementary file 1 [file downloadSupplementary]
